# Supplementary material for: Kinetic aspects of the adsorption of xyloglucan onto cellulose nanocrystals
Source: Royal Society of Chemistry journal article supplement (doi:10.1039/c5sm01413a), 2015-01-01
Supplement: c5sm01413a1.pdf [file c5sm01413a1.pdf]

## Supporting Information

# Kinetic aspects of the adsorption of xyloglucan onto cellulose nanocrystals

*Ana Villares, \* Céline Moreau, Abir Dammak, Isabelle Capron, Bernard Cathala*

UR1268 Biopolymères Interactions Assemblages, INRA, F-44316 Nantes, France

**\*To whom correspondences should be addressed:** Ana.Villares-Garicochea@nantes.inra.fr  
(Ana Villares)

Fax: +33 240675043

**Other authors' email addresses:** celine.moreau@nantes.inra.fr (Moreau),  
Abir.Dammak@nantes.inra.fr (A. Dammak), Isabelle.Capron@nantes.inra.fr (Capron), and  
bernard.cathala@nantes.inra.fr (Cathala)

## Provided Supporting Information

### I. Adsorption of XG onto CNC surfaces

**Figure S1.** Normalized frequency ( $\Delta f/n$ ) and dissipation ( $\Delta D/n$ ) changes for the overtone number  $n = 3$  of the CNC surface exposed to XG aqueous solutions at different concentrations (0.3-20  $\mu\text{g mL}^{-1}$ ) as a function of time. The arrows indicate where XG is injected and the rinse step with water.

### II. Kinetic study of XG adsorption onto CNC surfaces

**Figure S2.** Values of the kinetic constant for adsorption onto uncovered CNC surfaces,  $k_1$ , as a function of XG concentration.

**Figure S3.** Values of the kinetic constant for XG adsorption after rearrangement,  $k_2$ , as a function of XG concentration.

## I. Adsorption of XG onto CNC surfaces

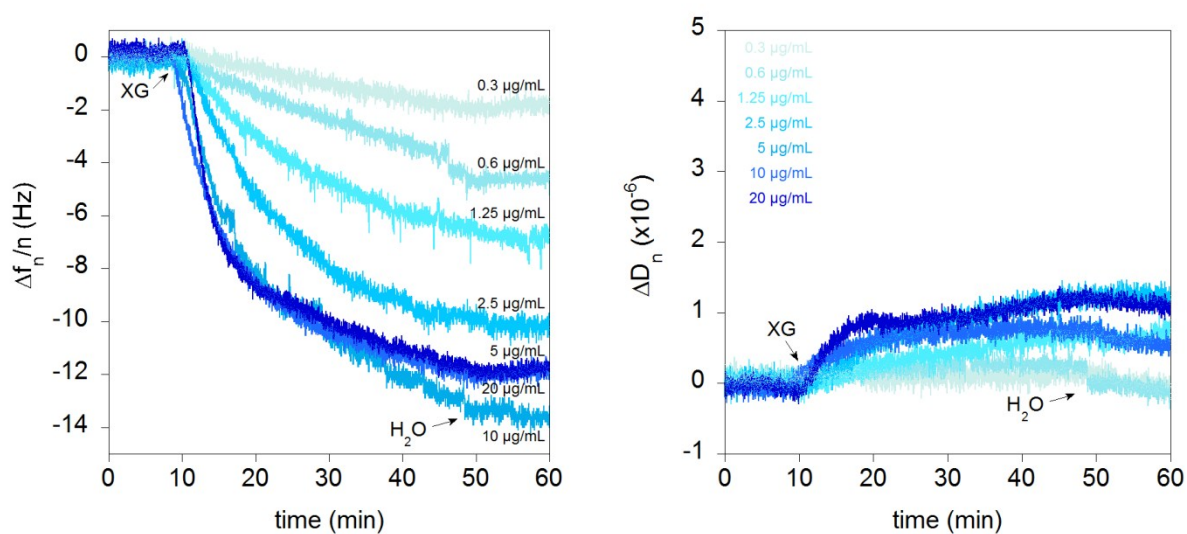

**Figure S1.** Normalized frequency ( $\Delta f_n/n$ ) and dissipation ( $\Delta D_n$ ) changes for the overtone number  $n = 3$  of the CNC surface exposed to XG aqueous solutions at different concentrations ( $0.3\text{-}20 \mu\text{g mL}^{-1}$ ) as a function of time. The arrows indicate where XG is injected and the rinse step with water.

## II. Kinetic study of XG adsorption onto CNC surfaces

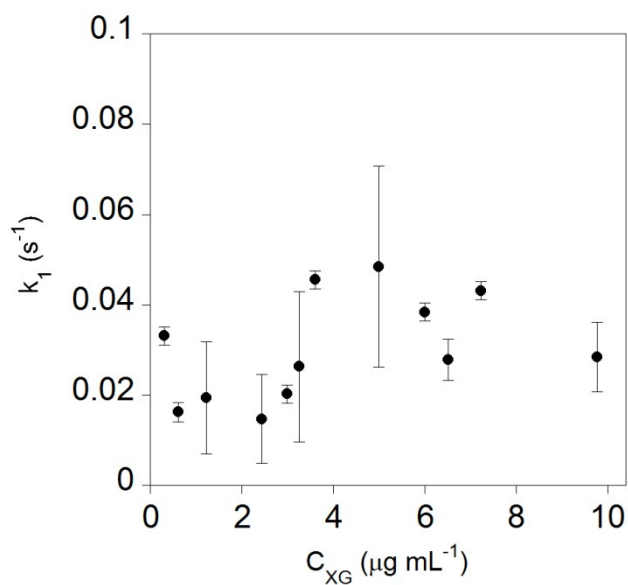

**Figure S2.** Values of the kinetic constant for adsorption onto uncovered CNC surfaces,  $k_1$ , as a function of XG concentration.

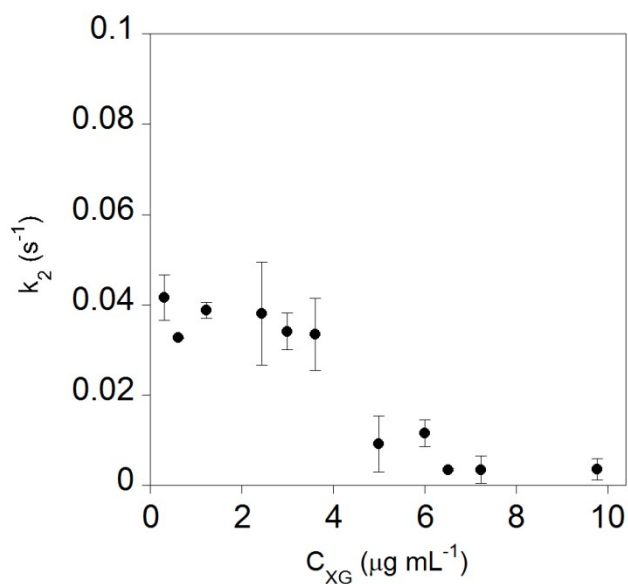

**Figure S3.** Values of the kinetic constant for XG adsorption after rearrangement,  $k_2$ , as a function of XG concentration.
